# Supplementary material
Source: PubMed Central journal article supplement (PMC2723149)
Supplement: supp_122_13_2311__1.pdf [file supp_122_13_2311__1.pdf]

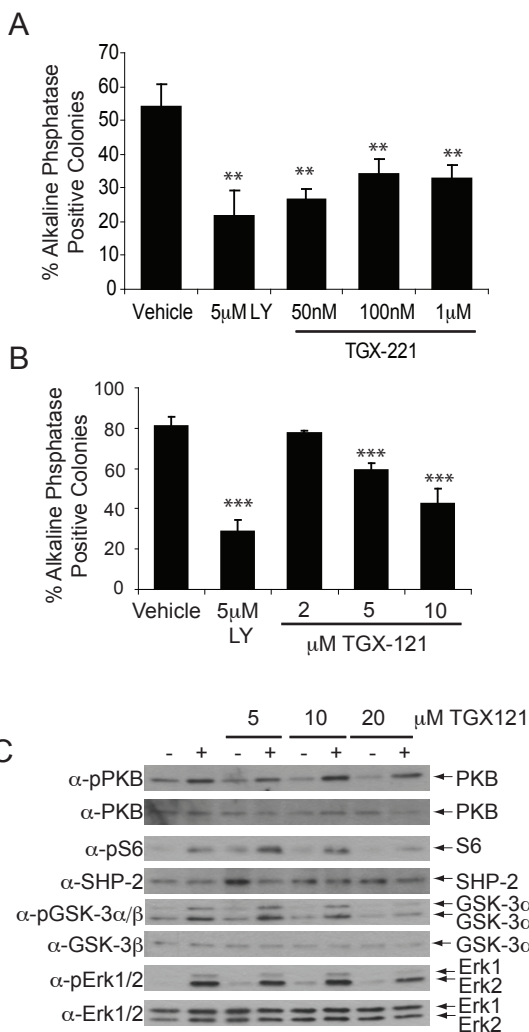

**Figure S1: Pharmacological Inhibition of p110 $\beta$  with either TGX-221 and TGX-121 decrease mESC self-renewal.** (A) Murine ESCs cultured in the presence of LIF were treated for 4 days with LY294002, TGX-221 or with vehicle alone (DMSO) at the doses indicated. Self-renewal was assessed by staining for alkaline phosphatase. Data are expressed as the average percentage of self-renewing colonies in each condition with s.e.m (n=4). ANOVA (p=0.008) and Dunnet's post-hoc test were applied, \*\* indicates p<0.001. (B) Murine ESCs were treated for 4 days with LY294002, TGX-121 or with vehicle alone (DMSO) at the doses indicated. Self-renewal was assessed by staining for alkaline phosphatase. Data are expressed as a mean of 4 individual experiments with s.e.m. ANOVA (p=0.001) and Dunnet's post-hoc test were applied, \*\*\* indicates p<0.001. (C) Cells were treated with TGX-121 30 minutes prior to stimulation with 1000 U/ml LIF for 10 minutes. Cell lysates were resolved by SDS-PAGE and appropriate antibodies were used to detect signalling downstream of PI3Ks.
