# Supplementary material
Source: PubMed Central journal article supplement (PMC2723149)
Supplement: supp_122_13_2311__2.pdf [file supp_122_13_2311__2.pdf]

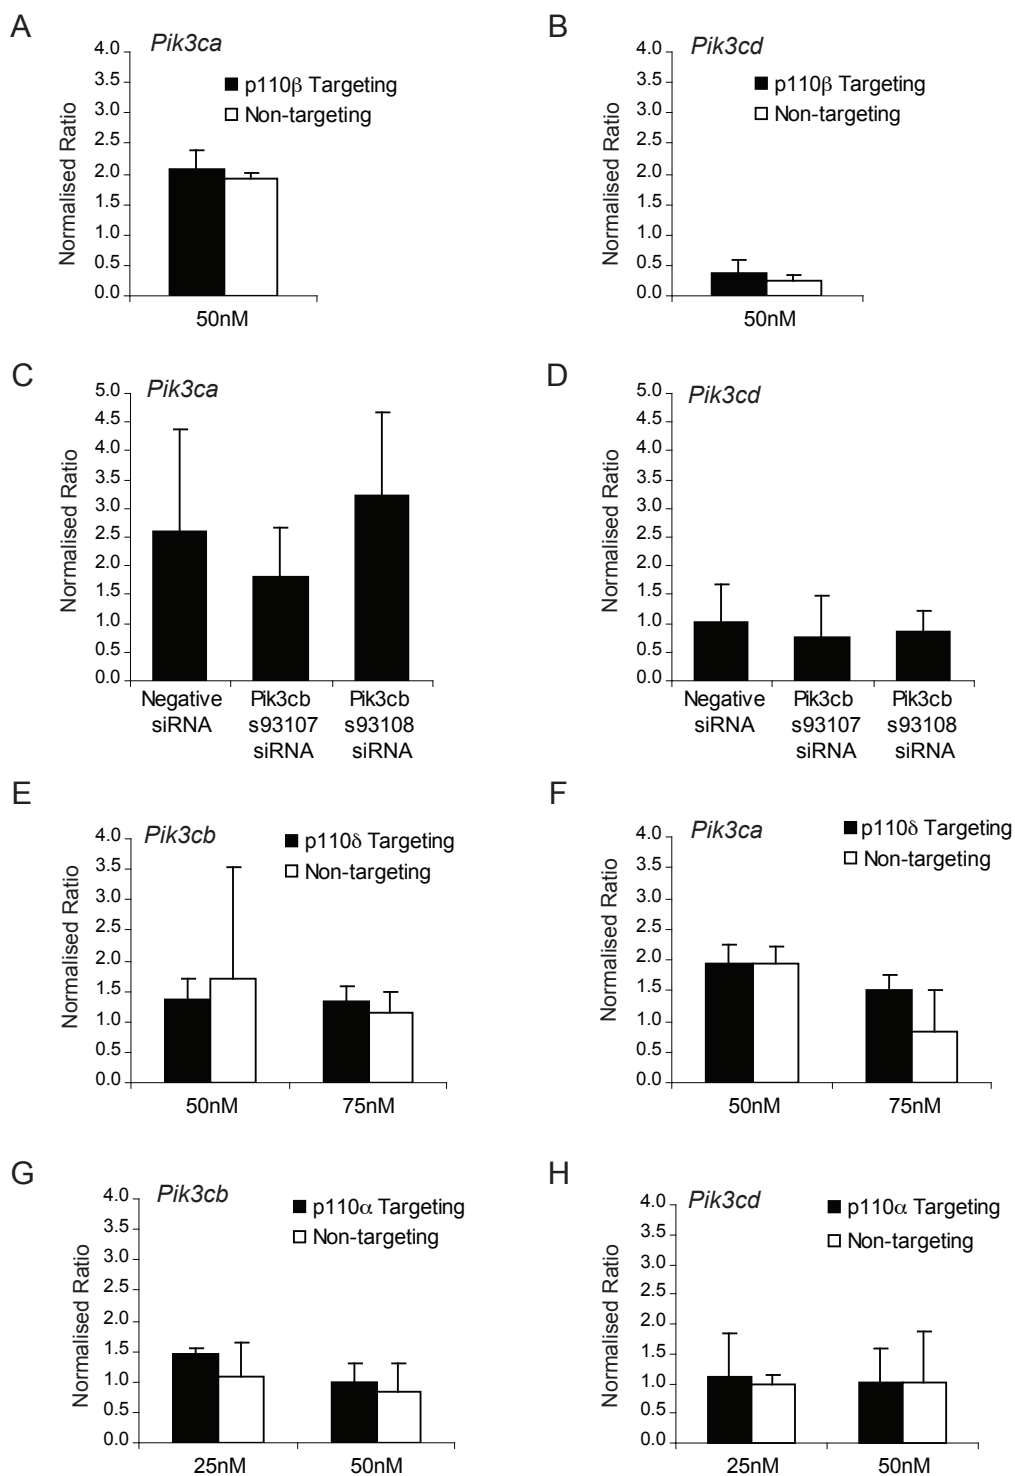

**Figure S2: Expression of other p110 isoforms following targeting siRNA knock-down**

The effect of siRNA knock-down of specific p110 catalytic isoforms was assessed on expression of other p110 subunits. (A) Expression of p110 $\alpha$  following p110 $\beta$  knock-down with Dharmacon Smartpool *Pik3cb* siRNAs. (B) Expression of p110 $\delta$  following p110 $\beta$  knock-down with Dharmacon Smartpool *Pik3cb* siRNAs. (C) Expression of p110 $\alpha$  following p110 $\beta$  knock-down with Ambion Silencer Select siRNAs. (D) Expression of p110 $\delta$  following p110 $\beta$  knock-down with Ambion Silencer Select siRNAs. (E) Expression of p110 $\beta$  following p110 $\delta$  knock-down with Dharmacon Smartpool *Pik3cd* siRNAs. (F) Expression of p110 $\alpha$  following p110 $\delta$  knock-down with Dharmacon Smartpool *Pik3cd* siRNAs. (G) Expression of p110 $\beta$  following p110 $\alpha$  knock-down with Dharmacon Smartpool *Pik3ca* siRNAs. (H): Expression of p110 $\delta$  following knock-down p110 $\alpha$  with Dharmacon Smartpool *Pik3ca* siRNAs.
