# Supplementary material
Source: PubMed Central journal article supplement (PMC2723149)
Supplement: supp_122_13_2311__3.pdf [file supp_122_13_2311__3.pdf]

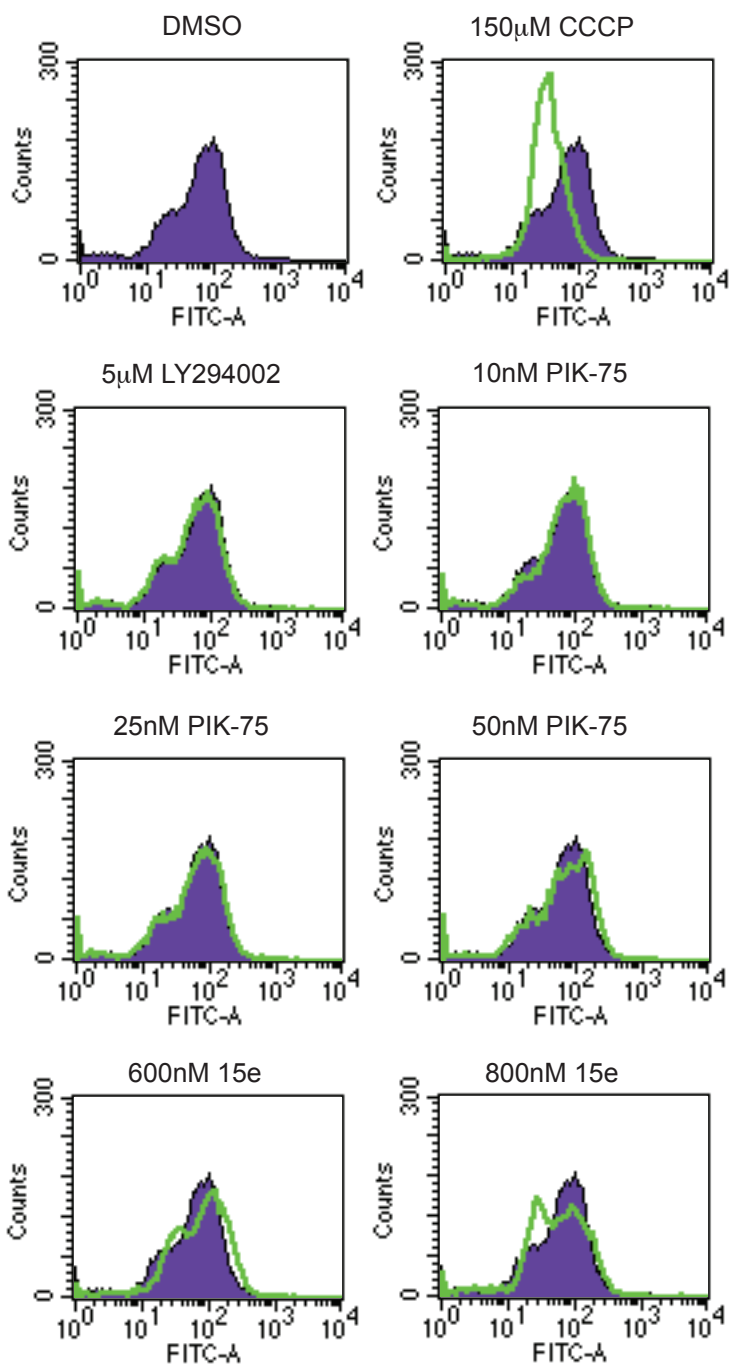

**Figure S3 Levels of apoptosis are unaffected by treatment with p110 $\alpha$  selective inhibitors.** DiOC6 staining was carried out on cells following 18h incubation with the PI3K inhibitors at the concentrations indicated. ESs treated with vehicle (DMSO) served as the control, while the same cells treated with CCCP, a mitochondrial uncoupling agent, were used to define the shift in fluorescence observed following the mitochondrial membrane potential permeability transition. Fluorescence was analysed by flow cytometry and cells with lowest levels of fluorescence are those likely to be undergoing early apoptosis. Data are representative of three independent experiments.
